# Supplementary material for: An intramolecular t-SNARE complex functions in vivo without the syntaxin NH2-terminal regulatory domain
Source: PubMed Central journal article supplement — J Cell Biol. 2006 Jan 16;172(2):295–307. doi: 10.1083/jcb.200507138 (PMC2063558; doi:10.1083/jcb.200507138), 2006-01-16
Supplement: supp_jcb.200507138_1.pdf [file supp_jcb.200507138_1.pdf]

Van Komen et al. <http://www.jcb.org/cgi/doi/10.1083/jcb.200507138>

#### Invertase secretion assay

Cell cultures of W3031A, JMY128, JMY304, JMY307, and JMY309 were grown to 0.5 OD<sub>600</sub> units/ml in synthetic complete media containing 2% galactose at 30°C. 1 OD<sub>600</sub> unit of each cell culture was harvested and washed once with 10 mM NaN<sub>3</sub>, once with 0.5M NaOAc, pH 5.0, and resuspended in 1 ml of the same buffer. Glucose produced by external invertase was generated in a reaction containing 25  $\mu$ l of the cells (0.025 OD<sub>600</sub> units) in 0.5 M NaOAc, pH 5.0, and 25  $\mu$ l of 0.5 M sucrose. The cells and substrate were incubated at 30°C for 5 min, and the reaction was stopped by adding 100  $\mu$ l of 0.5 M sodium phosphate buffer, pH 7.4, followed by immediate heating at 100°C for 5 min. The amount of glucose generated by invertase was determined by a coupled glucose oxidase peroxidase reaction using Amplex red as a fluorogenic substrate (Amplex red glucose/Glucose Oxidase Kit; Invitrogen).

#### Halo secretion assay

Cell cultures of JMY204, JMY307, and JMY309 were grown at 30°C overnight in synthetic complete media with 2% galactose, whereas the MAT $\alpha$  tester strain RC634 (MAT $\alpha$  sst1-3 rme1 ade2 his6 met1 ura1 can1 cyh2) was grown in YPRG (2% raffinose and 2% galactose) media. Each strain was back diluted to ~0.5 OD<sub>600</sub> in the appropriate media and allowed to grow for 2 h. The cultures were then washed three times with water and resuspended in water to a final volume of 0.5 OD<sub>600</sub>/ml. A 1:10 dilution of RC634 in water was made, and 500  $\mu$ l of sample were spread onto a YPRG plate and allowed to completely dry. 10  $\mu$ l of JMY204, JMY307, and JMY309 (0.005 OD<sub>600</sub> of cells) were spotted onto the MAT $\alpha$  tester lawn and grown for 2 d at 30°C to test for  $\alpha$ -factor secretion. The halo represents a zone of cell cycle arrest in the MAT $\alpha$  lawn as a result of  $\alpha$ -factor secretion from the MAT $\alpha$  strains. The size of the halo is a qualitative measure of secretion.

**A**

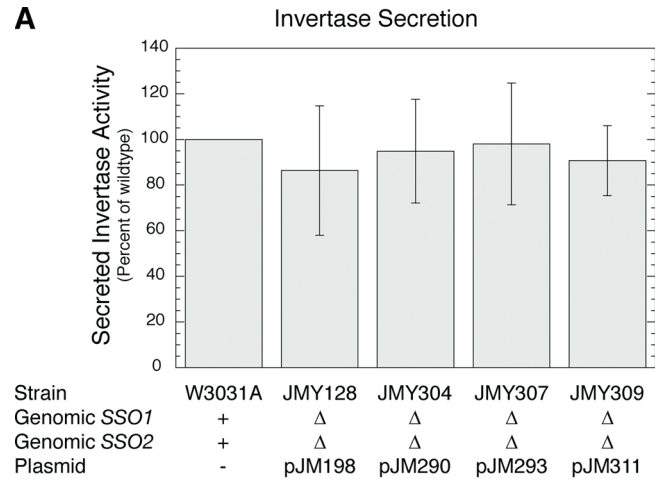

**B**

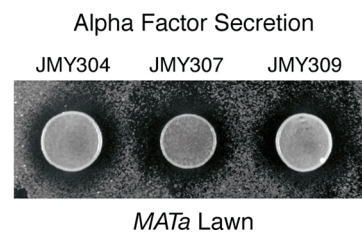

**Figure S1. Strains expressing only the tandem t-SNAREs have similar levels of secretion as wild-type cells.** (A) External invertase activity. Cell cultures of W3031A, JMY128, JMY304, JMY307, and JMY309 were grown in synthetic complete media containing 2% galactose at 30°C, and external invertase activity was measured. Levels of external invertase were determined for each strain and compared with the W3031A wild-type strain. Three independent samples from each strain were measured twice in the coupled assay. The data in A represents an average of three independent sets of cultures. The error bars are standard errors of the mean. (B)  $\alpha$ -Factor secretion. 10  $\mu$ l of washed cells [JMY304, 307, and 309] grown to mid-log phase were spotted onto a YPRG plate containing a lawn of MAT $\alpha$  tester cells [RC634]. The cells were grown at 30°C for 2 d. Each of the tandem t-SNARE strains appears to secrete equal amounts of  $\alpha$  factor as determined by the size of the halo around the cells.
